# Supplementary material for: Multiple species of wild tree peonies gave rise to the ‘king of flowers’, Paeonia suffruticosa Andrews
Source: PubMed Central journal article supplement (PMC4240985; doi:10.1098/rspb.2014.1687), 2014-12-22
Supplement: rspb20141687supp2.pdf [file rspb20141687supp2.pdf]

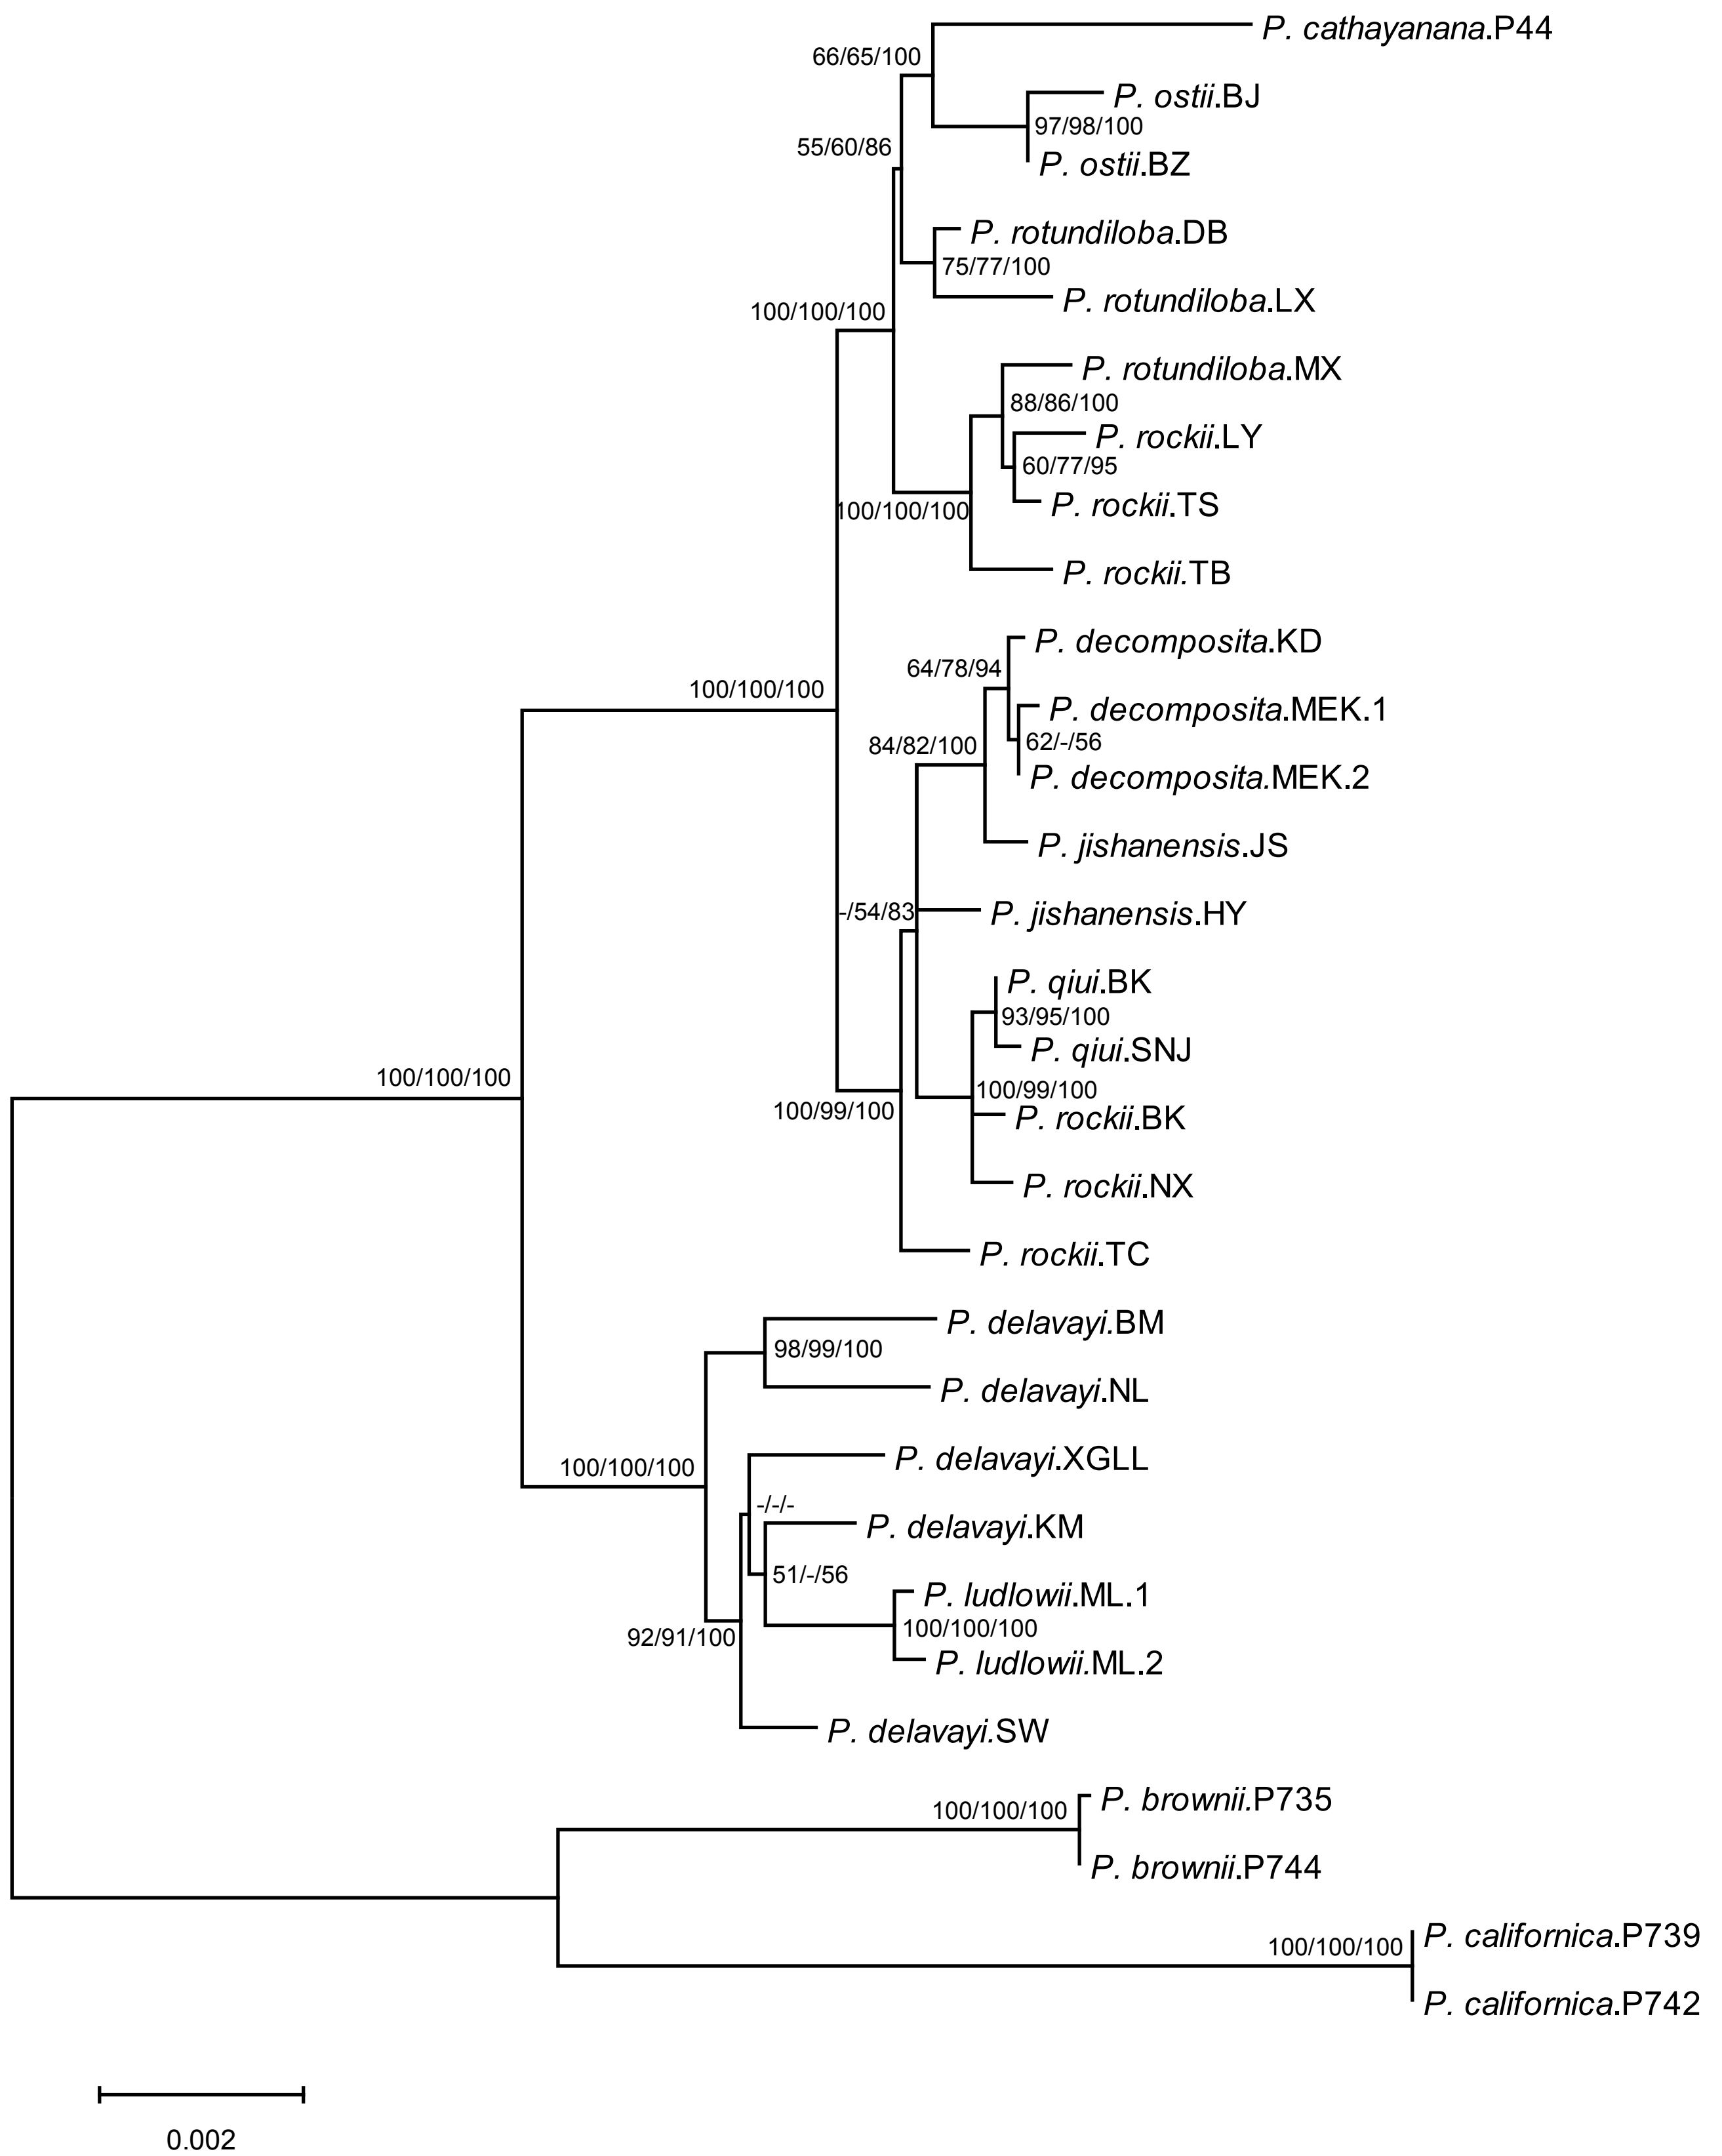

Figure S1. The maximum likelihood tree inferred from concatenation of 14 chloroplast regions from wild species. Numbers on braches represent support values from ML/MP/BI analyses and the value below 50% is represented by hyphen.
